CORRECTION

## Correction: Prevalence of HIV-1 drug resistance in Eastern European and Central Asian countries

Alina Kirichenko, Dmitry Kireev, Alexey Lopatukhin, Anastasia Murzakova, Ilya Lapovok, Daria Saleeva, Natalya Ladnaya, Agigat Gadirova, Sabina Ibrahimova, Aygun Safarova, Trdat Grigoryan, Arshak Petrosyan, Tatevik Sarhatyan, Elena Gasich, Anastasia Bunas, Iryna Glinskaya, Pavel Yurovsky, Rustam Nurov, Alijon Soliev, Laylo Ismatova, Erkin Musabaev, Evgeniya Kazakova, Visola Rakhimova, Vadim Pokrovsky

[S1 Table](#) was uploaded incorrectly. Please see the correct [S1 Table](#) here.

### Supporting information

**S1 Table. Epidemiological and clinical characteristics of the study population.**  
(PDF)

### Reference

1. Kirichenko A, Kireev D, Lopatukhin A, Murzakova A, Lapovok I, Saleeva D, et al. Prevalence of HIV-1 drug resistance in Eastern European and Central Asian countries. PLoS One. 2022;17(1):e0257731. <https://doi.org/10.1371/journal.pone.0257731> PMID: [35061671](https://pubmed.ncbi.nlm.nih.gov/35061671/)

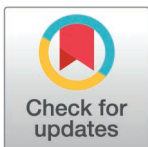

### OPEN ACCESS

**Citation:** Kirichenko A, Kireev D, Lopatukhin A, Murzakova A, Lapovok I, Saleeva D, et al. (2026) Correction: Prevalence of HIV-1 drug resistance in Eastern European and Central Asian countries. PLoS One 21(1): e0340124. <https://doi.org/10.1371/journal.pone.0340124>

**Published:** January 2, 2026

**Copyright:** © 2026 Kirichenko et al. This is an open access article distributed under the terms of the [Creative Commons Attribution License](https://creativecommons.org/licenses/by/4.0/), which permits unrestricted use, distribution, and reproduction in any medium, provided the original author and source are credited.
